# Supplementary material for: Synthesis of the 3’-O-sulfated TF antigen with a TEG-N3 linker for glycodendrimersomes preparation to study lectin binding
Source: publisher site journal article supplement (doi:10.3762/bjoc.20.17), 2024-01-30

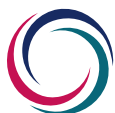

## Supporting Information

for

### Synthesis of the 3'-O-sulfated TF antigen with a TEG-N<sub>3</sub> linker for glycodendrimersomes preparation to study lectin binding

Mark Reihill, Hanyue Ma, Dennis Bengtsson and Stefan Oscarson

*Beilstein J. Org. Chem.* **2024**, *20*, 173–180. [doi:10.3762/bjoc.20.17](https://doi.org/10.3762/bjoc.20.17)

### NMR spectra of compounds 1–5, 7 and 8

## Table of content

|                                                                                                                                                                                                                                                             |     |
|-------------------------------------------------------------------------------------------------------------------------------------------------------------------------------------------------------------------------------------------------------------|-----|
| Phenyl 3- <i>O</i> -acetyl-2-deoxy-4,6- <i>O</i> -di- <i>tert</i> -butylsilylene-1-thio-2-(2'2'2'-trichloroethoxycarbonylamino)- $\beta$ -D-galactopyranoside <sup>9,10</sup> ( <b>3</b> )                                                                  |     |
| <sup>1</sup> H NMR, 500 MHz.....                                                                                                                                                                                                                            | S2  |
| <sup>13</sup> C NMR, 126 MHz.....                                                                                                                                                                                                                           | S3  |
| 2-[2-(2-Azidoethoxy)ethoxy]ethyl 3- <i>O</i> -acetyl-2-deoxy-4,6- <i>O</i> -di- <i>tert</i> -butylsilylene-2-(2'2'2'-trichloroethoxycarbonylamino)- $\alpha$ -D-galactopyranoside ( <b>4</b> )                                                              |     |
| <sup>1</sup> H NMR, 500 MHz.....                                                                                                                                                                                                                            | S4  |
| <sup>13</sup> C NMR, 126 MHz.....                                                                                                                                                                                                                           | S5  |
| 2-[2-(2-Azidoethoxy)ethoxy]ethyl 2-deoxy-4,6- <i>O</i> -di- <i>tert</i> -butylsilylene-2-(2'2'2'-trichloroethoxycarbonylamino)- $\alpha$ -D-galactopyranoside ( <b>5</b> )                                                                                  |     |
| <sup>1</sup> H NMR, 500 MHz.....                                                                                                                                                                                                                            | S6  |
| <sup>13</sup> C NMR, 126 MHz.....                                                                                                                                                                                                                           | S7  |
| 2-[2-(2-Azidoethoxy)ethoxy]ethyl 2,3,4,6-tetra- <i>O</i> -acetyl- $\beta$ -D-galactopyranosyl-(1 $\rightarrow$ 3)-2-deoxy-4,6- <i>O</i> -di- <i>tert</i> -butylsilylene-2-(2'2'2'-trichloroethoxycarbonylamino)- $\alpha$ -D-galactopyranoside ( <b>7</b> ) |     |
| <sup>1</sup> H NMR, 500 MHz.....                                                                                                                                                                                                                            | S8  |
| 2-[2-(2-Azidoethoxy)ethoxy]ethyl 2,3,4,6-tetra- <i>O</i> -acetyl- $\beta$ -D-galactopyranosyl-(1 $\rightarrow$ 3)-2-acetamido-4,6-di- <i>O</i> -acetyl-2-deoxy- $\alpha$ -D-galactopyranoside <sup>3</sup> ( <b>8</b> )                                     |     |
| <sup>1</sup> H NMR, 500 MHz.....                                                                                                                                                                                                                            | S9  |
| <sup>13</sup> C NMR, 126 MHz.....                                                                                                                                                                                                                           | S10 |
| 2-[2-(2-Azidoethoxy)ethoxy]ethyl $\beta$ -D-galactopyranosyl-(1 $\rightarrow$ 3)-2-acetamido-2-deoxy- $\alpha$ -D-galactopyranoside <sup>3,4</sup> ( <b>1</b> )                                                                                             |     |
| <sup>1</sup> H NMR, 500 MHz.....                                                                                                                                                                                                                            | S11 |
| HSQC, <sup>1</sup> H NMR, 500 MHz, <sup>13</sup> C NMR.....                                                                                                                                                                                                 | S12 |
| 2-[2-(2-Azidoethoxy)ethoxy]ethyl 3- <i>O</i> -sulfo- $\beta$ -D-galactopyranosyl-(1 $\rightarrow$ 3)-2-acetamido-2-deoxy- $\alpha$ -D-galactopyranoside sodium salt ( <b>2</b> )                                                                            |     |
| <sup>1</sup> H NMR, 500 MHz.....                                                                                                                                                                                                                            | S13 |
| <sup>13</sup> C NMR, 126 MHz.....                                                                                                                                                                                                                           | S14 |
| HSQC, <sup>1</sup> H NMR, 400 MHz, <sup>13</sup> C NMR.....                                                                                                                                                                                                 | S15 |

Phenyl 3-O-acetyl-2-deoxy-4,6-O-di-*tert*-butylsilylene-1-thio-2-(2'2'-trichloroethoxycarbonylamino)- $\beta$ -D-galactopyranoside<sup>9,10</sup> (3)

<sup>1</sup>H NMR, 500 MHz

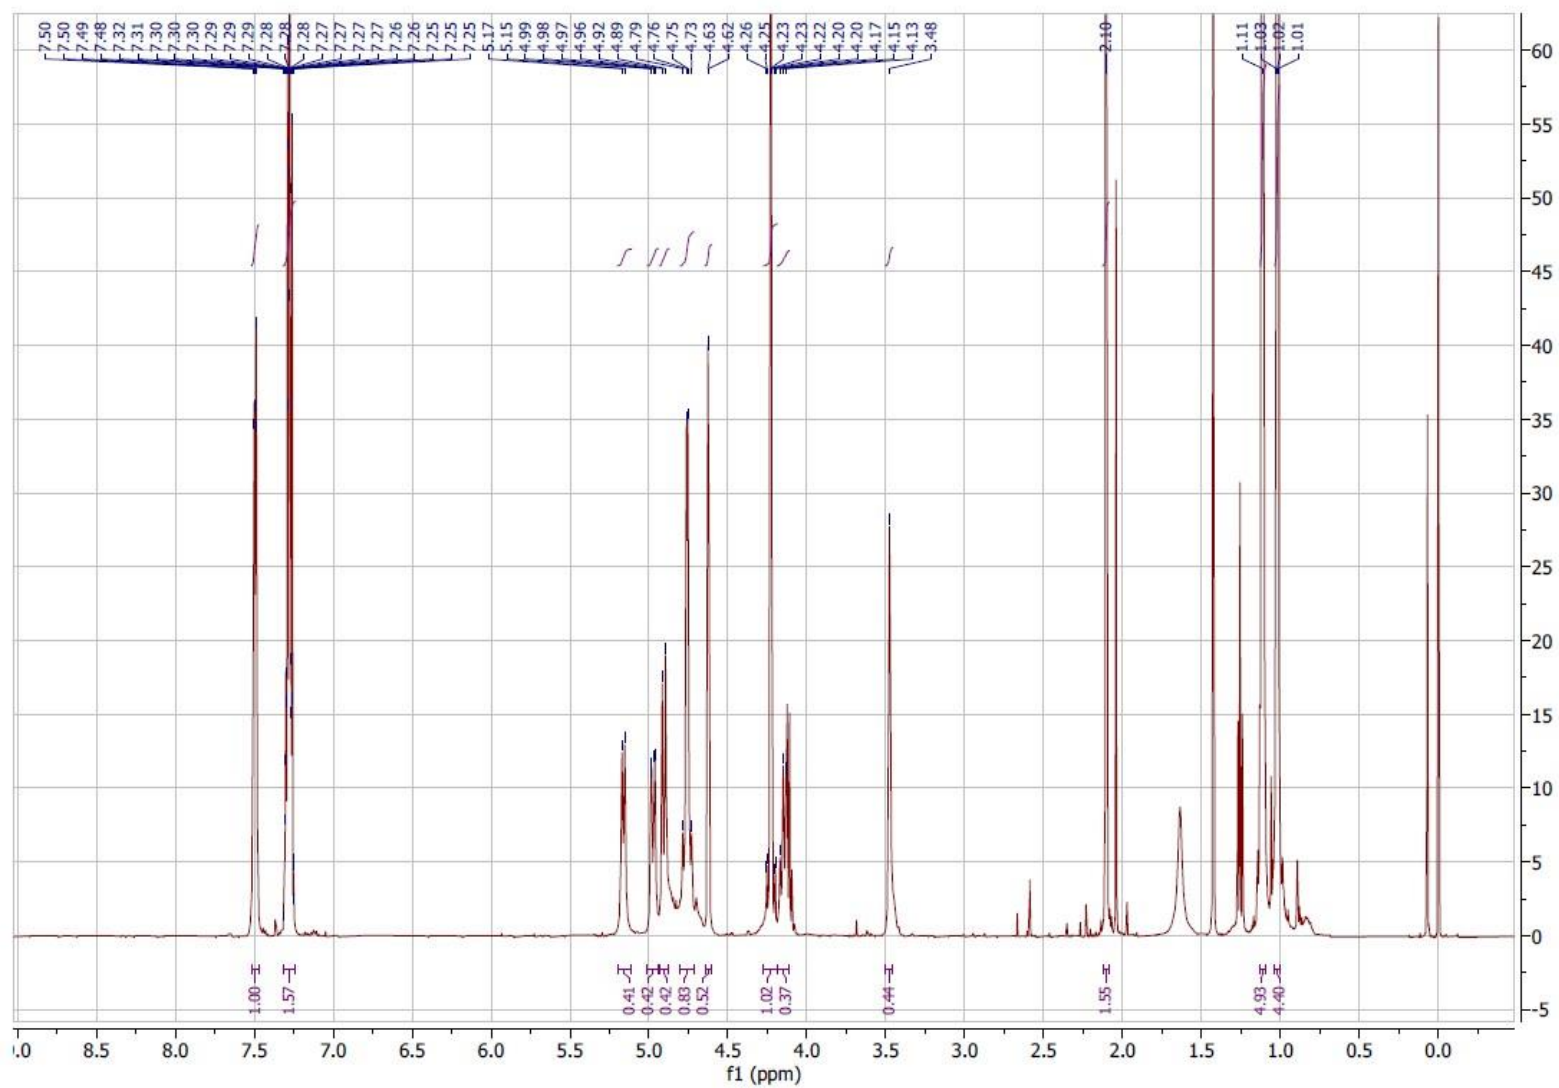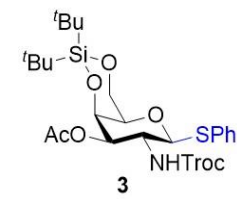

Phenyl 3-O-acetyl-2-deoxy-4,6-O-di-*tert*-butylsilylene-1-thio-2-(2'2'2'-trichloroethoxycarbonylamino)- $\beta$ -D-galactopyranoside<sup>9,10</sup> (3)

<sup>13</sup>C NMR, 126 MHz

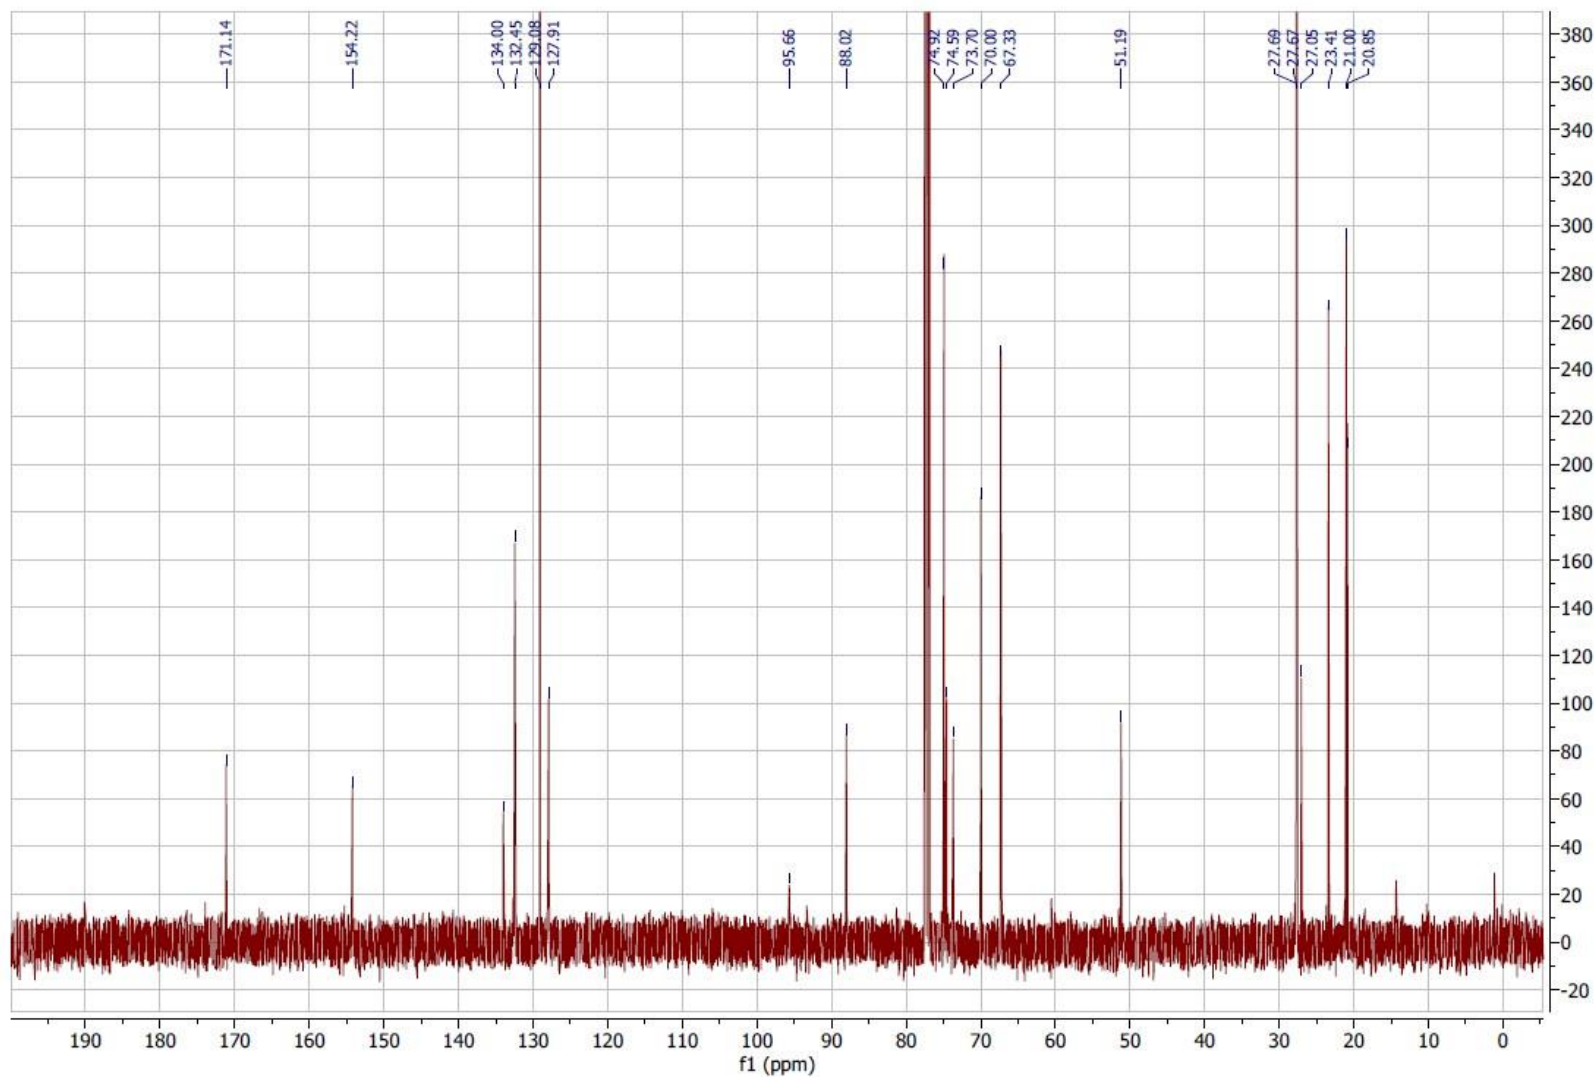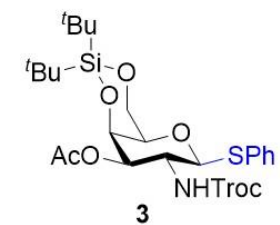

2-[2-(2-Azidoethoxy)ethoxy]ethyl 3-O-acetyl-2-deoxy-4,6-O-di-*tert*-butylsilylene-2-(2'2'2'-trichloroethoxycarbonylamino)- $\alpha$ -D-galactopyranoside (4)

$^1\text{H}$  NMR, 500 MHz

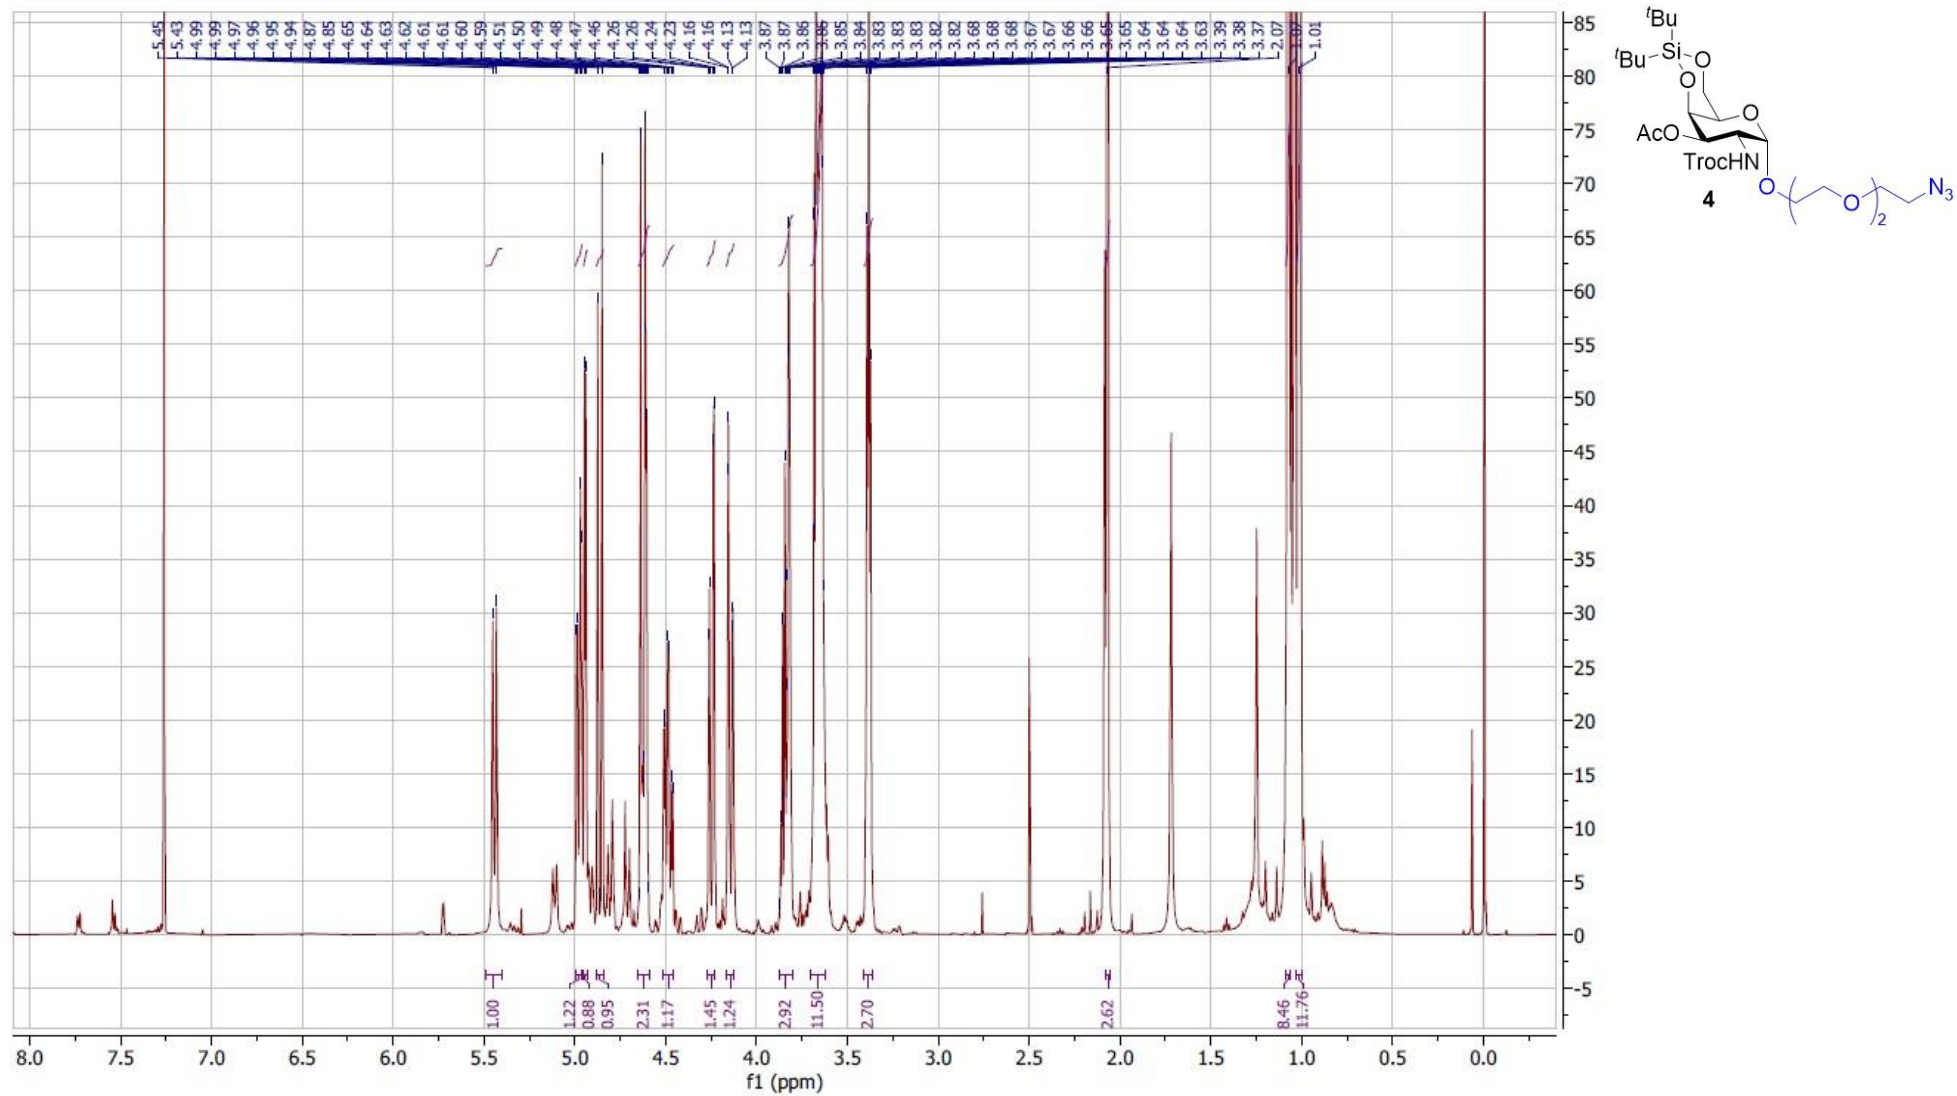

2-[2-(2-Azidoethoxy)ethoxy]ethyl 3-O-acetyl-2-deoxy-4,6-O-di-*tert*-butylsilylene-2-(2'2'2'-trichloroethoxycarbonylamino)- $\alpha$ -D-galactopyranoside (4)

$^{13}\text{C}$  NMR, 126 MHz

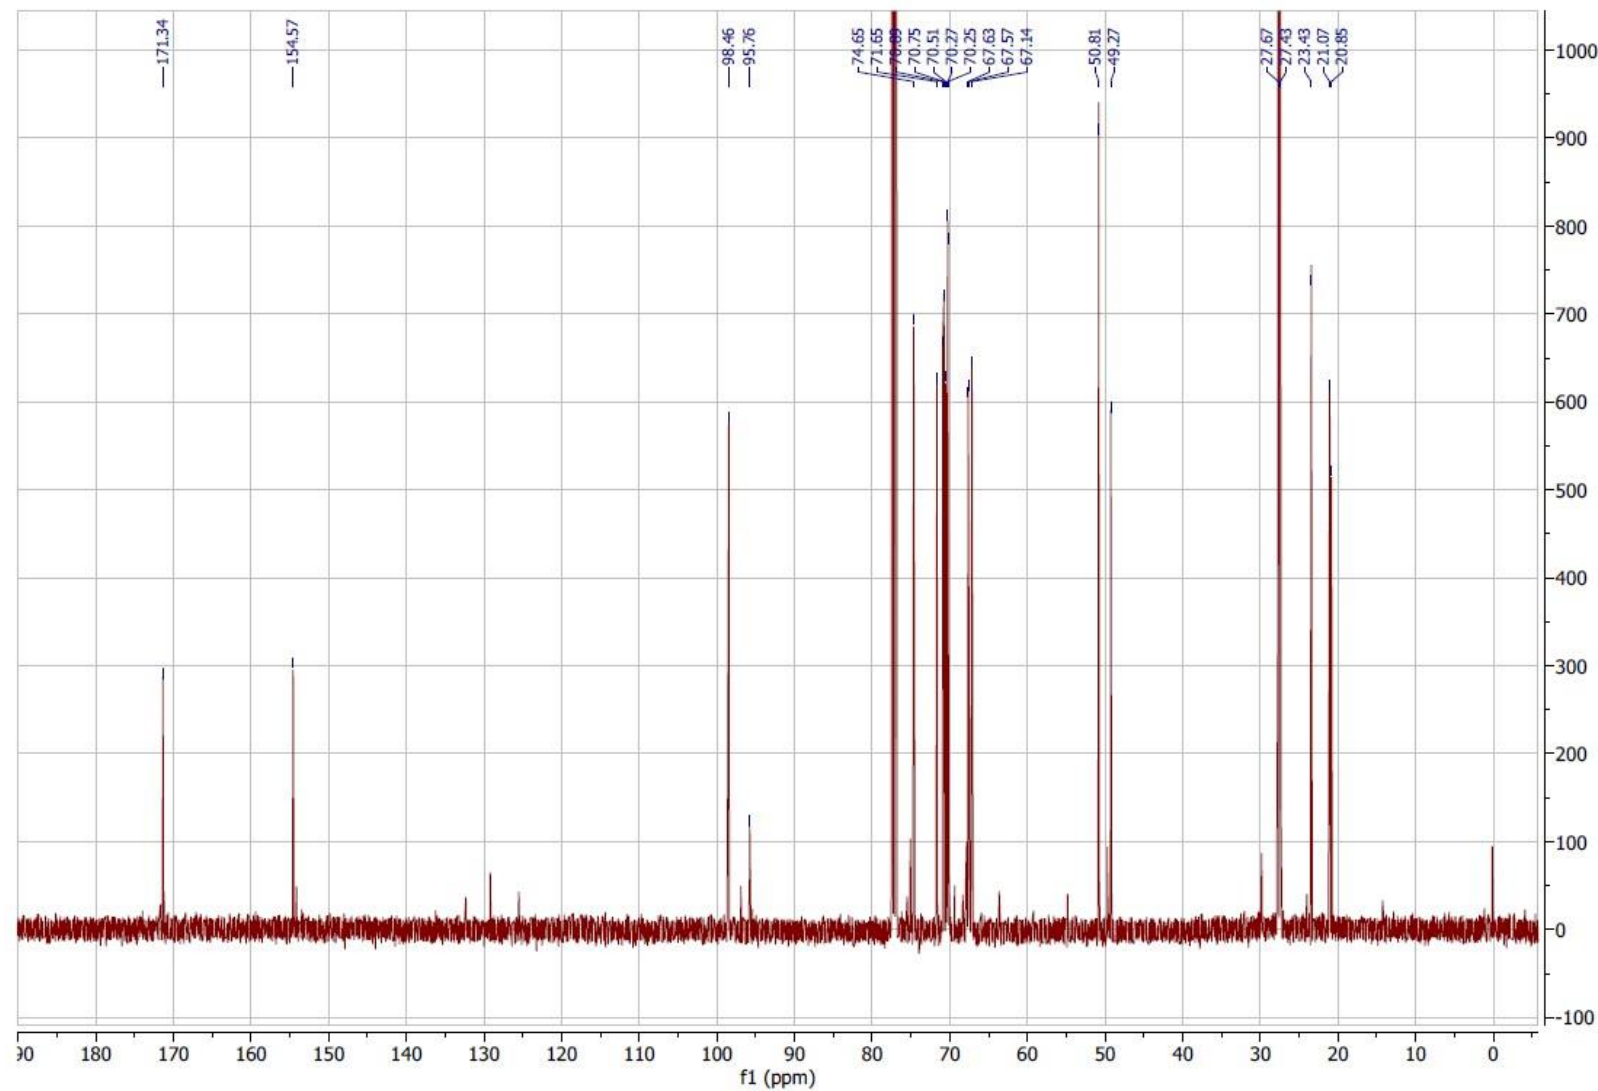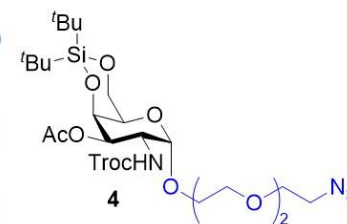

2-[2-(2-Azidoethoxy)ethoxy]ethyl 2-deoxy-4,6-O-di-*tert*-butylsilylene-2-(2'2'2'-trichloroethoxycarbonylamino)- $\alpha$ -D-galactopyranoside (5)

$^1\text{H}$  NMR, 500 MHz

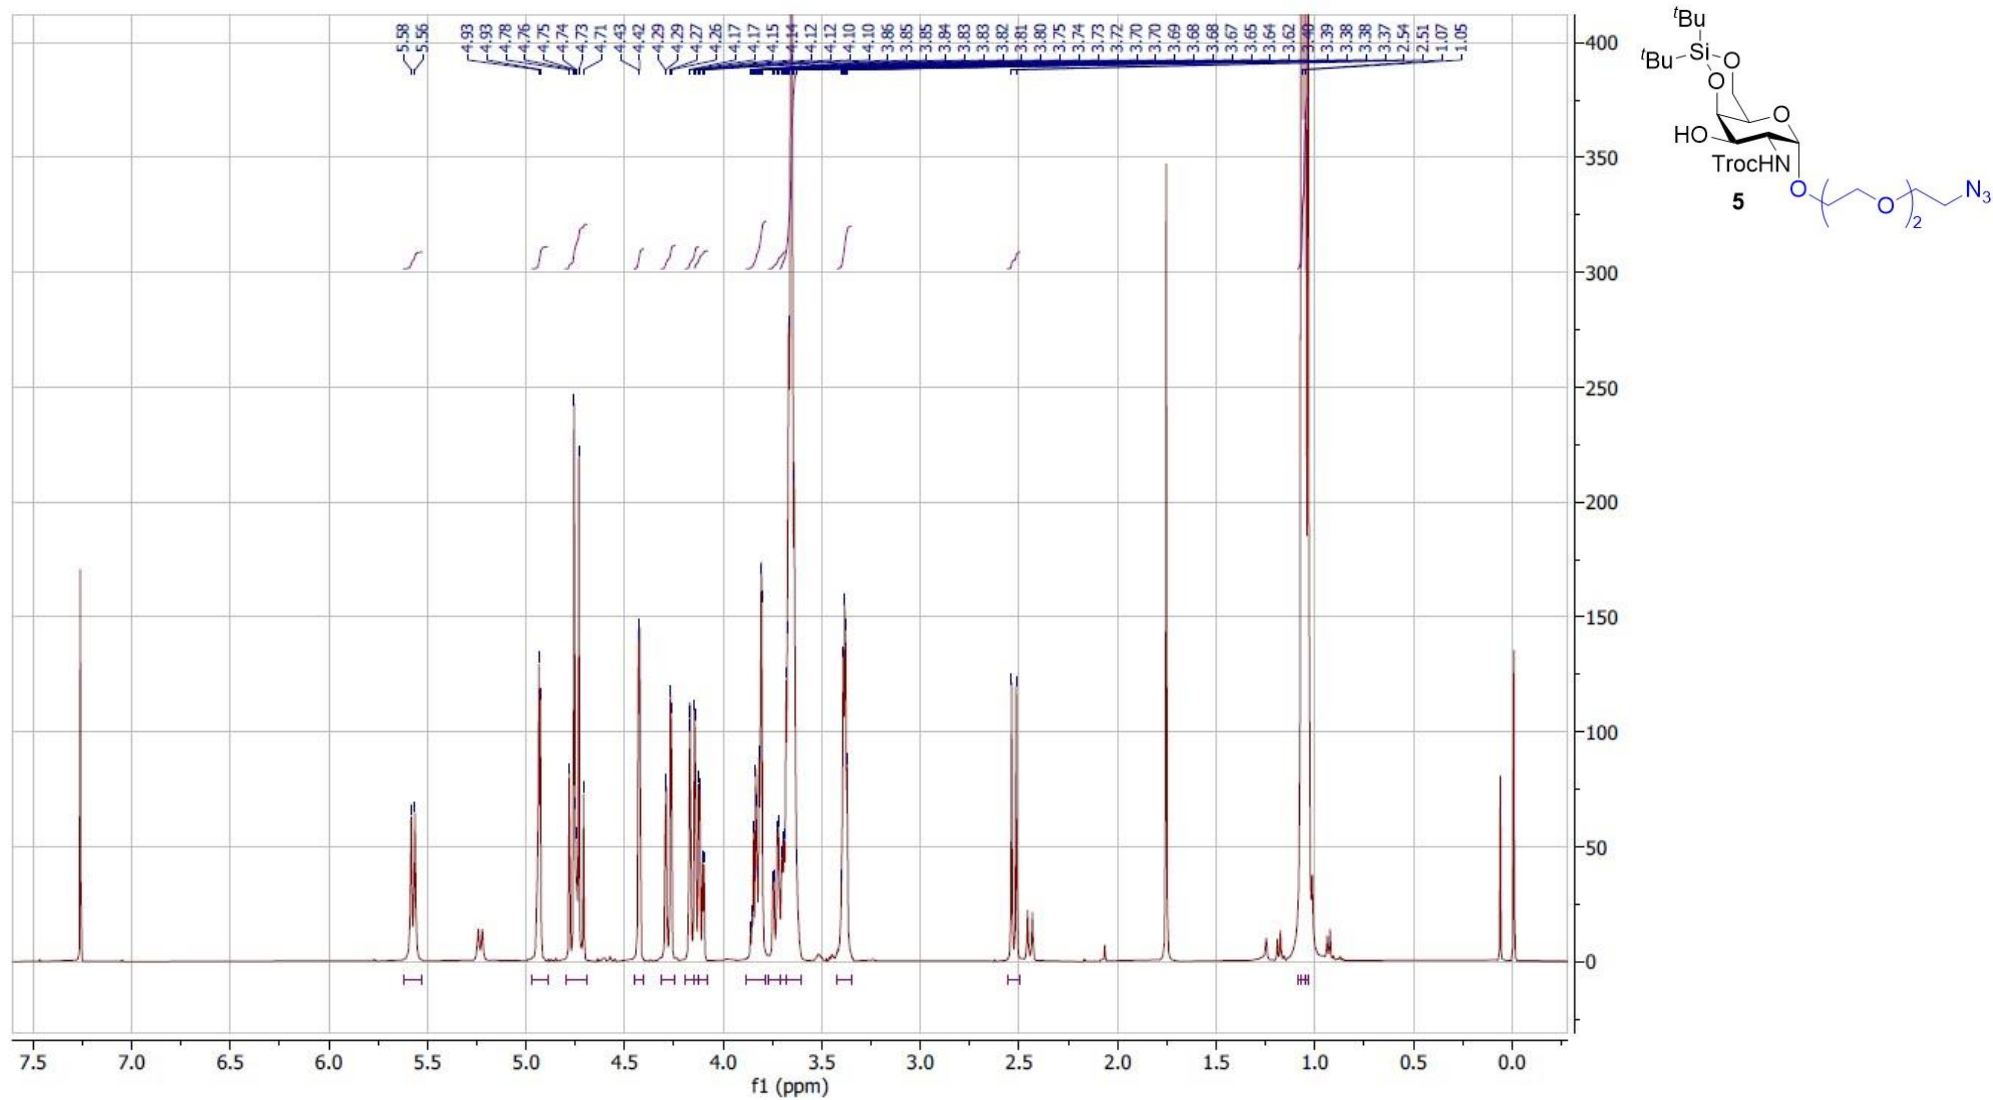

2-[2-(2-Azidoethoxy)ethoxy]ethyl 2-deoxy-4,6-O-di-*tert*-butylsilylene-2-(2'2'2'-trichloroethoxycarbonylamino)- $\alpha$ -D-galactopyranoside (5)

$^{13}\text{C}$  NMR, 126 MHz

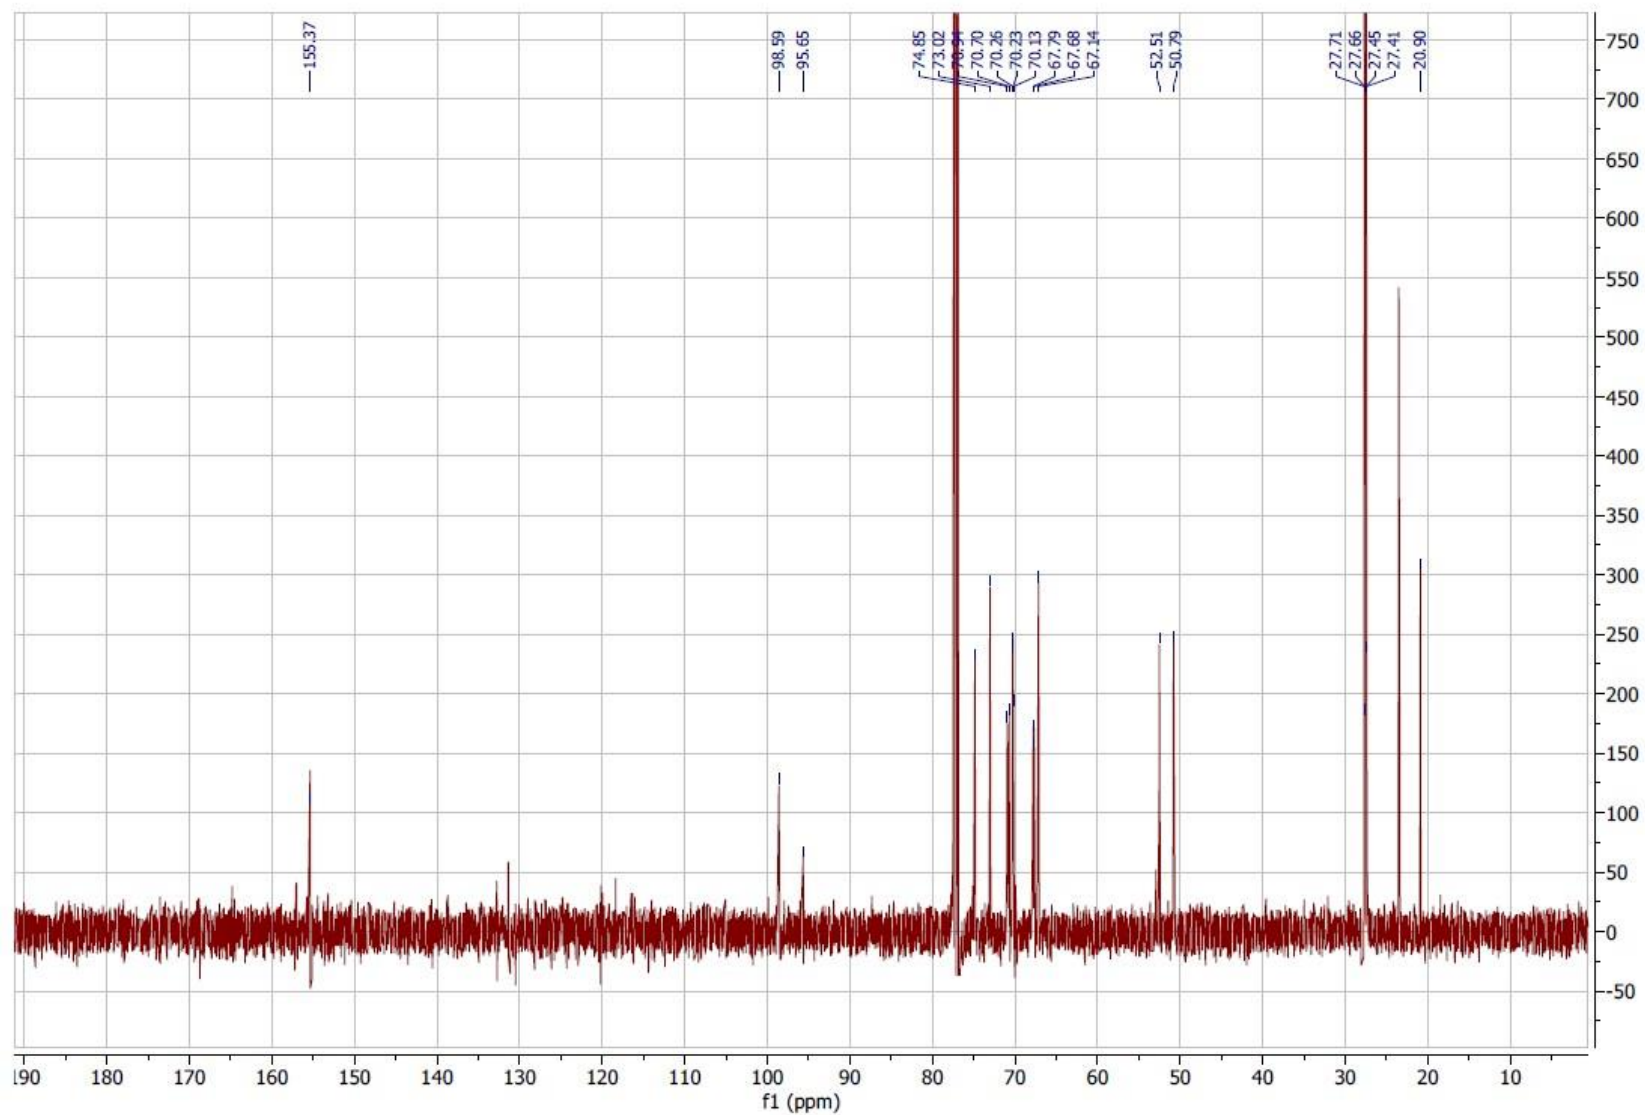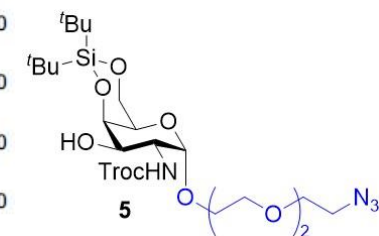



2-[2-(2-Azidoethoxy)ethoxy]ethyl 2,3,4,6-tetra-O-acetyl- $\beta$ -D-galactopyranosyl-(1 $\rightarrow$ 3)-2-deoxy-4,6-O-di-*tert*-butylsilylene-2-(2'2'2'-trichloroethoxycarbonylamino)- $\alpha$ -D-galactopyranoside (7)

$^1\text{H}$  NMR, 500 MHz

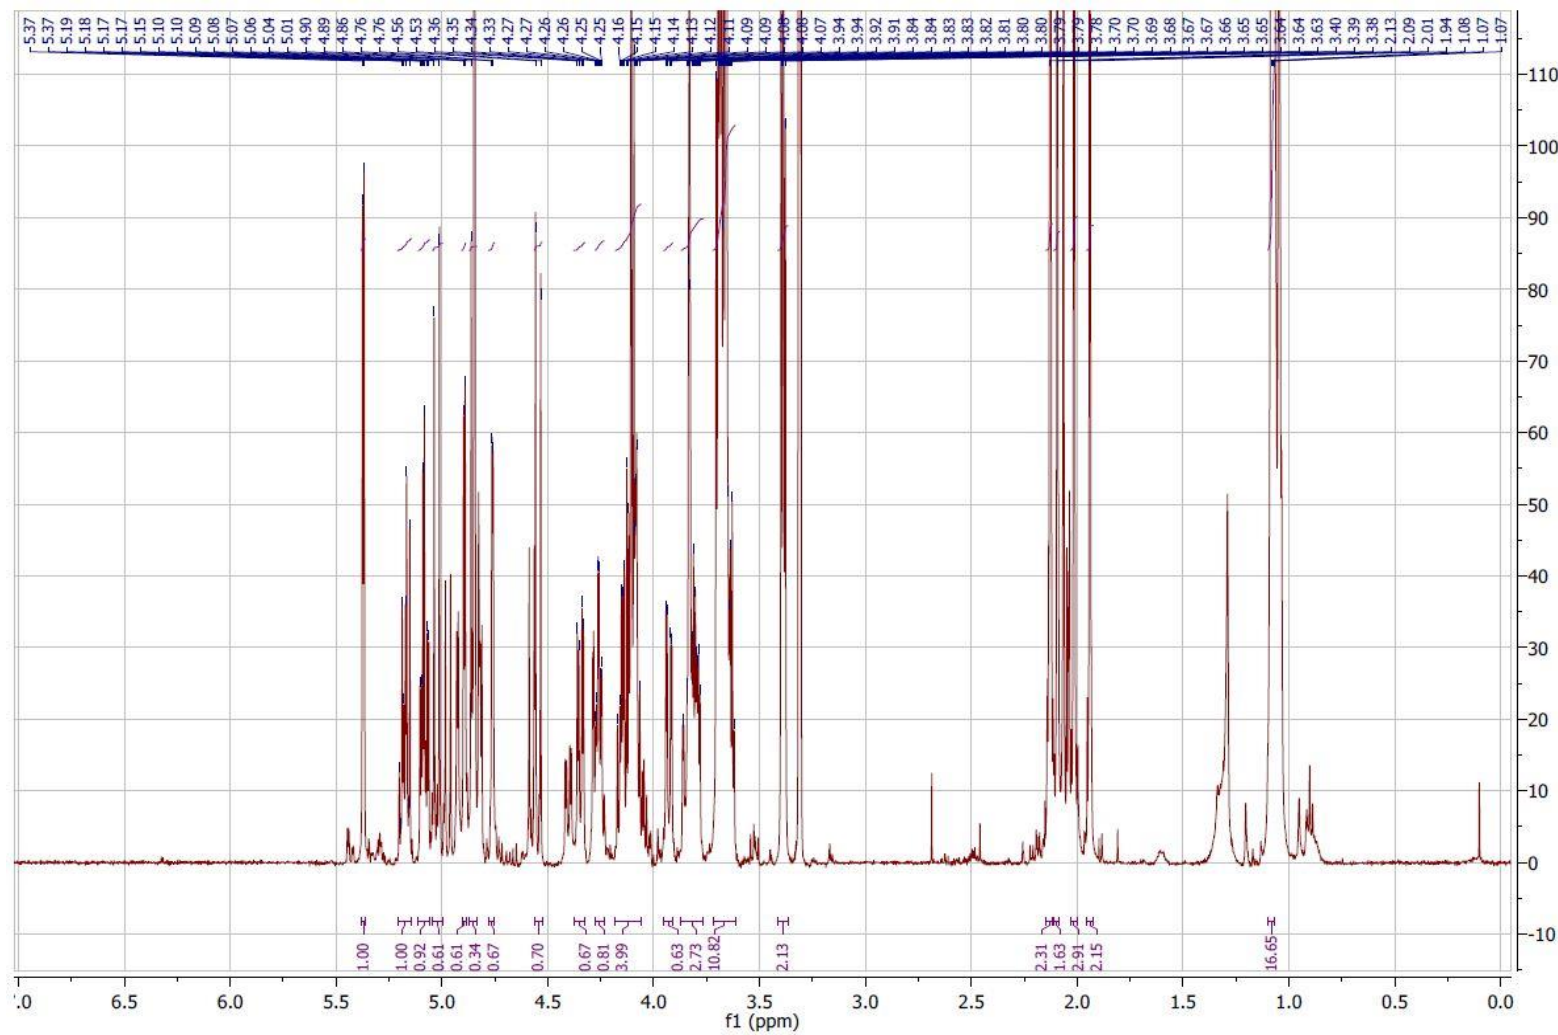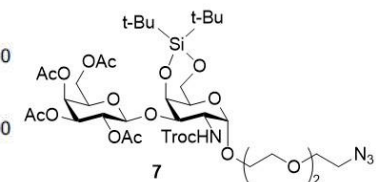

2-[2-(2-Azidoethoxy)ethoxy]ethyl 2,3,4,6-tetra-O-acetyl-β-D-galactopyranosyl-(1→3)-2-acetamido-4,6-di-O-acetyl-2-deoxy-α-D-galactopyranoside<sup>3</sup> (8)

<sup>1</sup>H NMR, 500 MHz

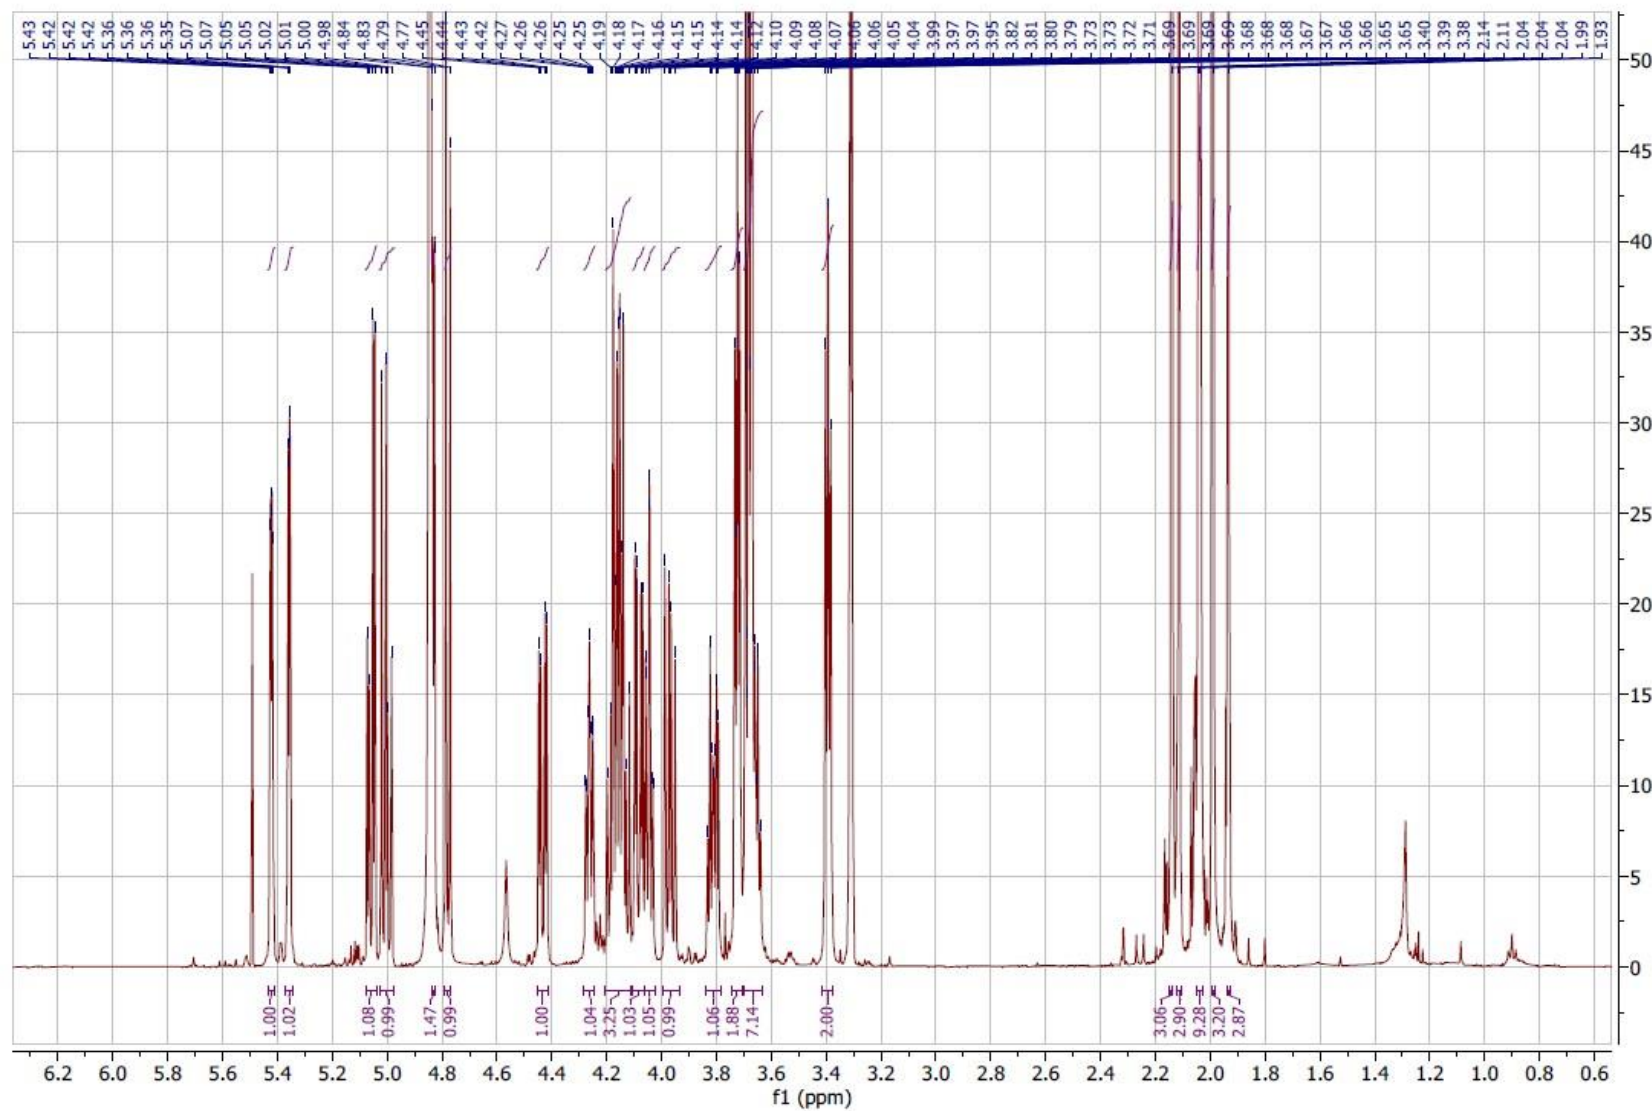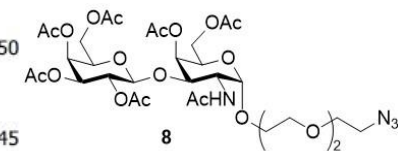

2-[2-(2-Azidoethoxy)ethoxy]ethyl 2,3,4,6-tetra-O-acetyl-β-D-galactopyranosyl-(1→3)-2-acetamido-4,6-di-O-acetyl-2-deoxy-α-D-galactopyranoside<sup>3</sup> (8)

<sup>13</sup>C NMR, 126 MHz

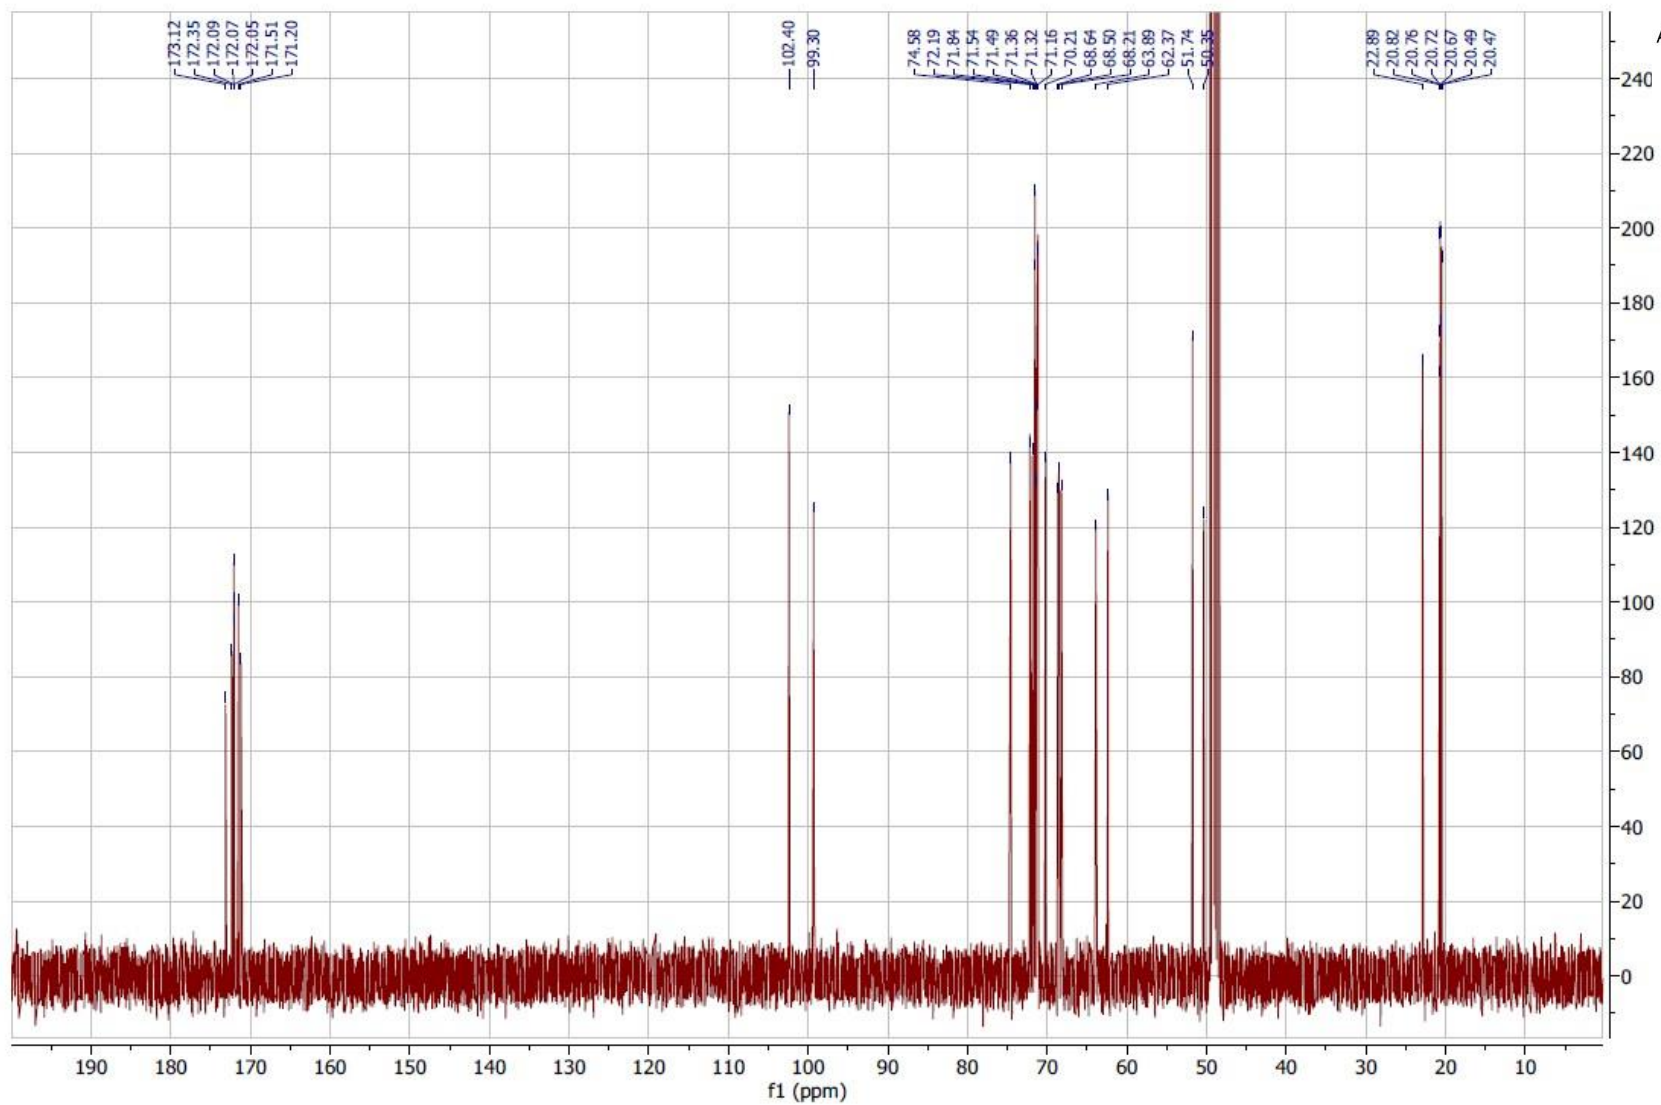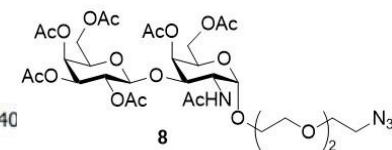

2-[2-(2-Azidoethoxy)ethoxy]ethyl  $\beta$ -D-galactopyranosyl-(1 $\rightarrow$ 3)-2-acetamido-2-deoxy- $\alpha$ -D-galactopyranoside<sup>3,4</sup> (1)

<sup>1</sup>H NMR, 500 MHz

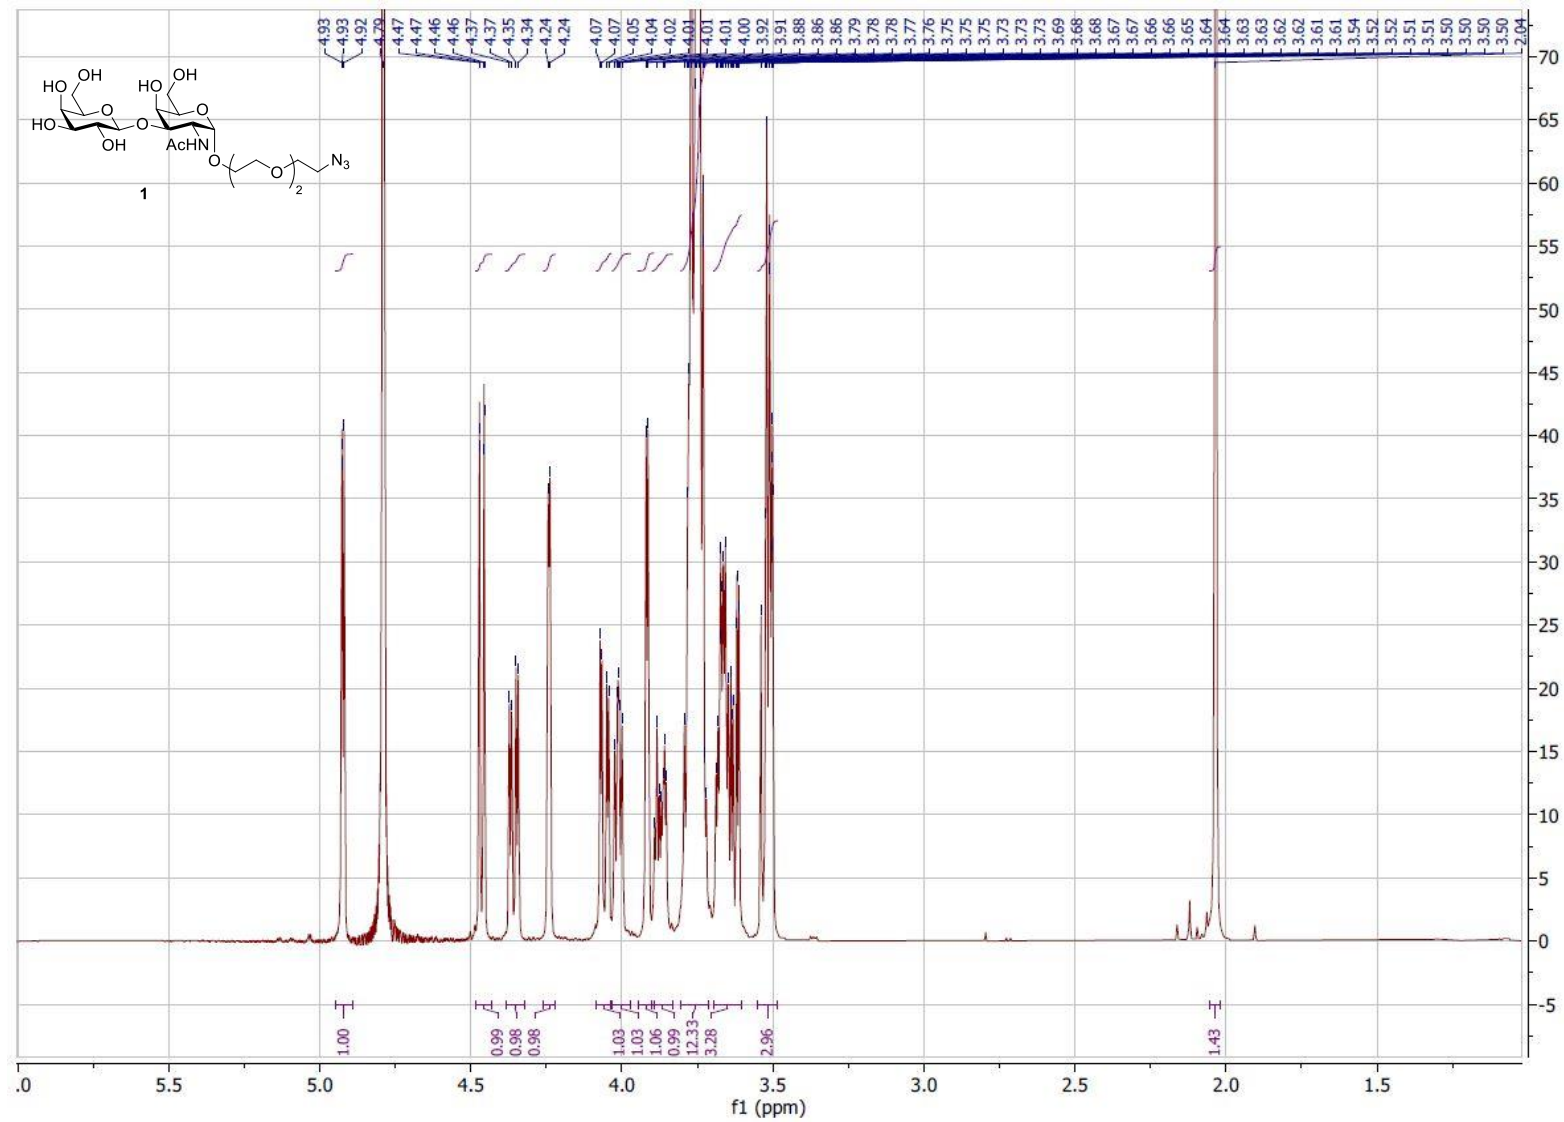

2-[2-(2-Azidoethoxy)ethoxy]ethyl  $\beta$ -D-galactopyranosyl-(1 $\rightarrow$ 3)-2-acetamido-2-deoxy- $\alpha$ -D-galactopyranoside<sup>3,4</sup> (1)

HSQC, <sup>1</sup>H NMR, 500 MHz, <sup>13</sup>C NMR projected

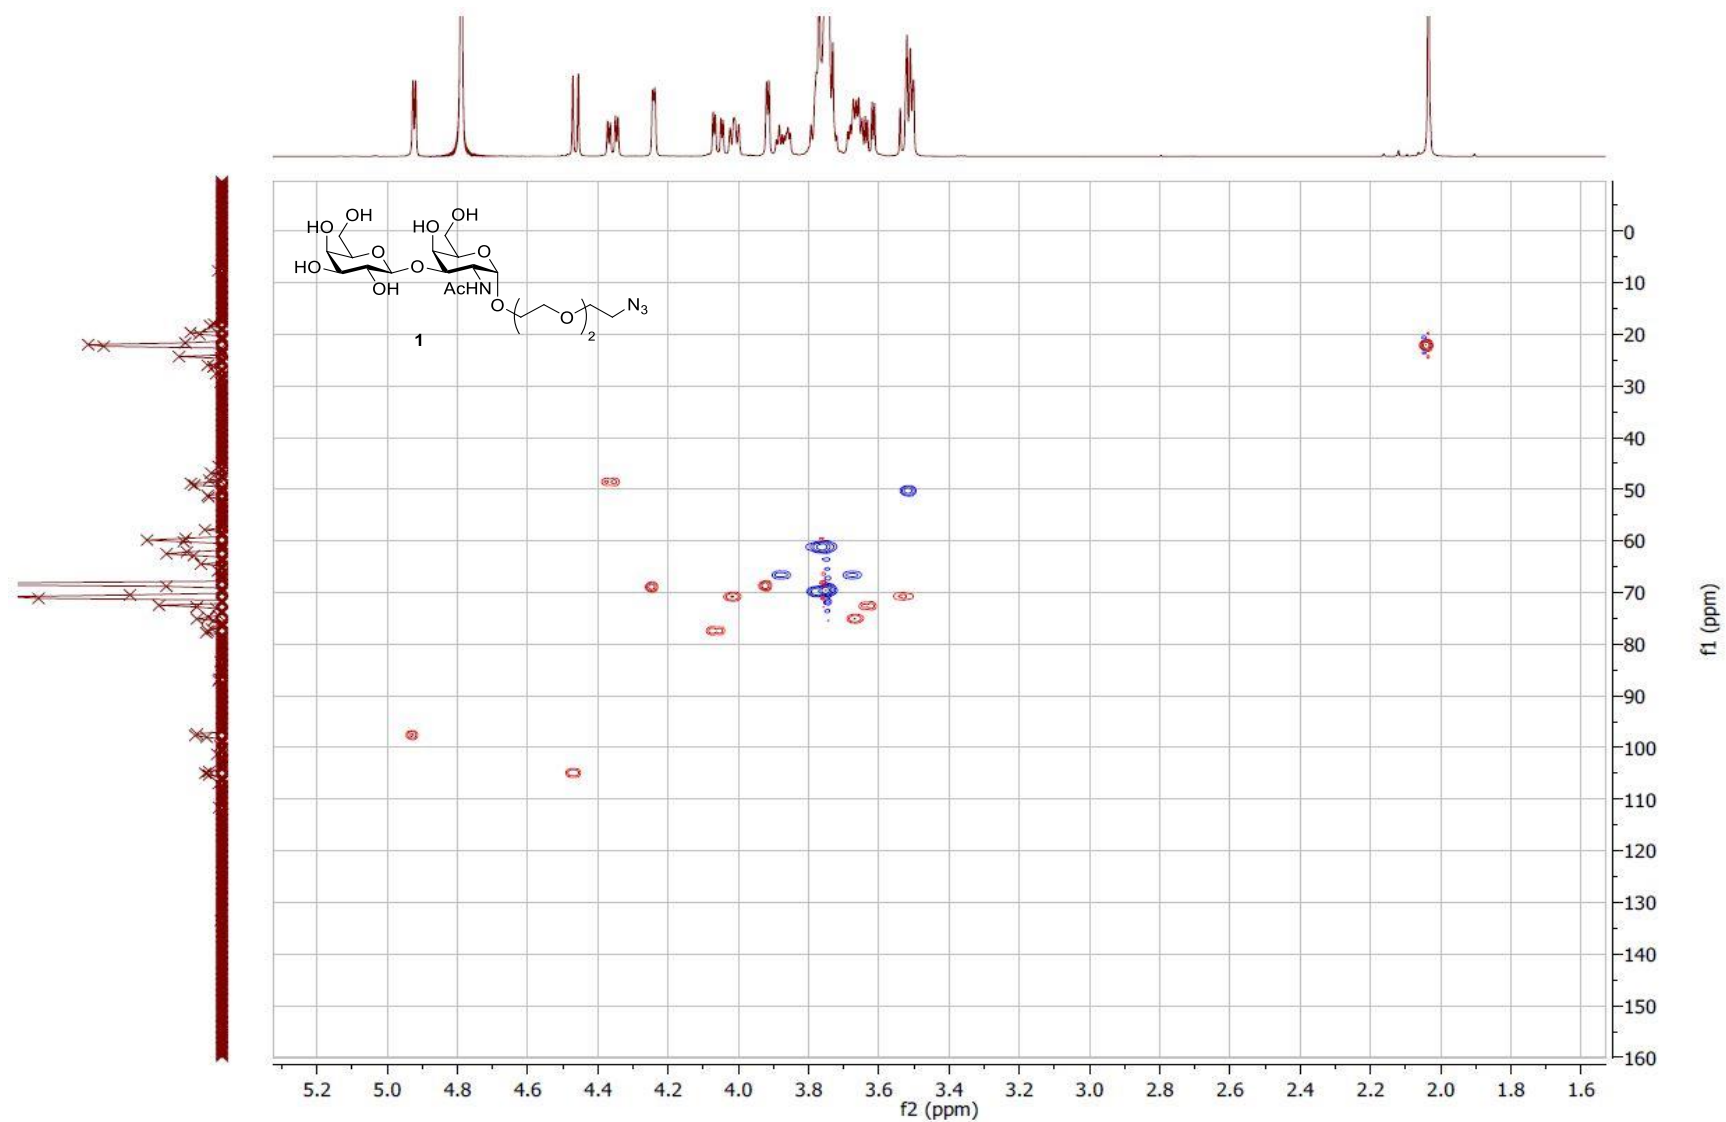

S12

2-[2-(2-Azidoethoxy)ethoxy]ethyl 3-O-sulfo-β-D-galactopyranosyl-(1→3)-2-acetamido-2-deoxy-α-D-galactopyranoside sodium salt (2)

<sup>1</sup>H NMR, 400 MHz

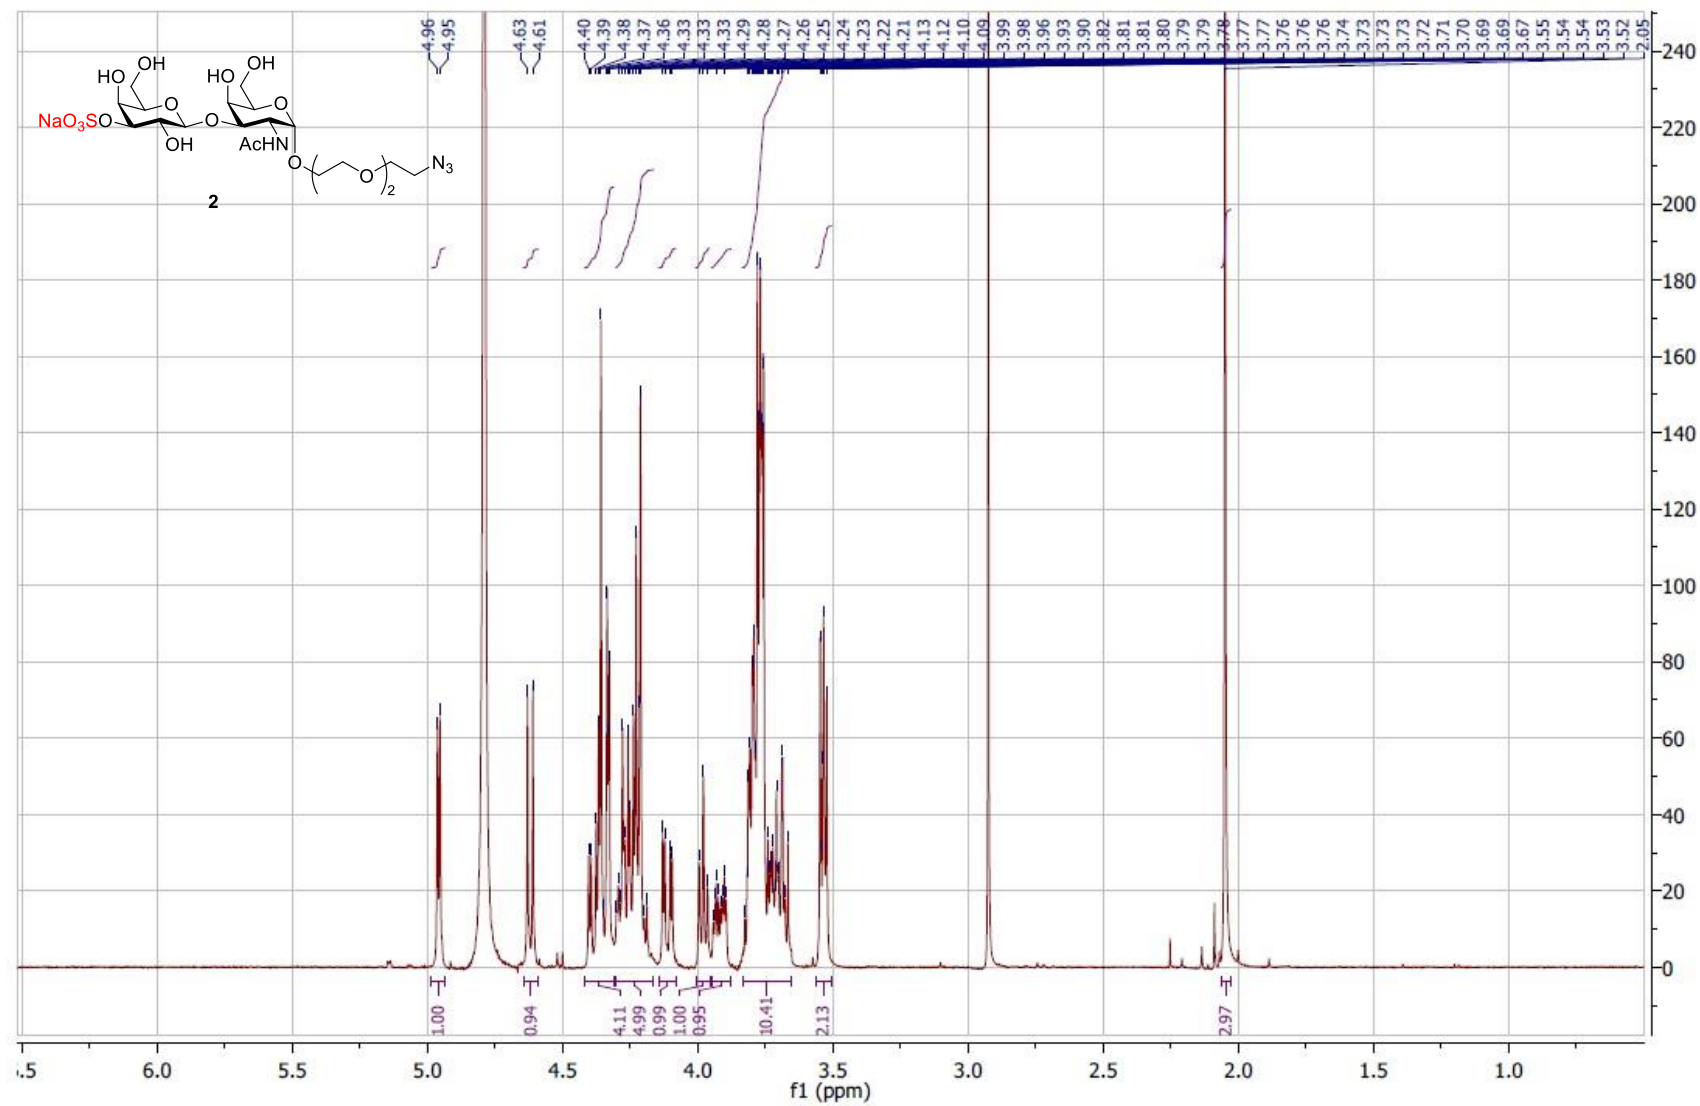

2-[2-(2-Azidoethoxy)ethoxy]ethyl 3-O-sulfo-β-D-galactopyranosyl-(1→3)-2-acetamido-2-deoxy-α-D-galactopyranoside sodium salt (2)

<sup>13</sup>C NMR, 101 MHz

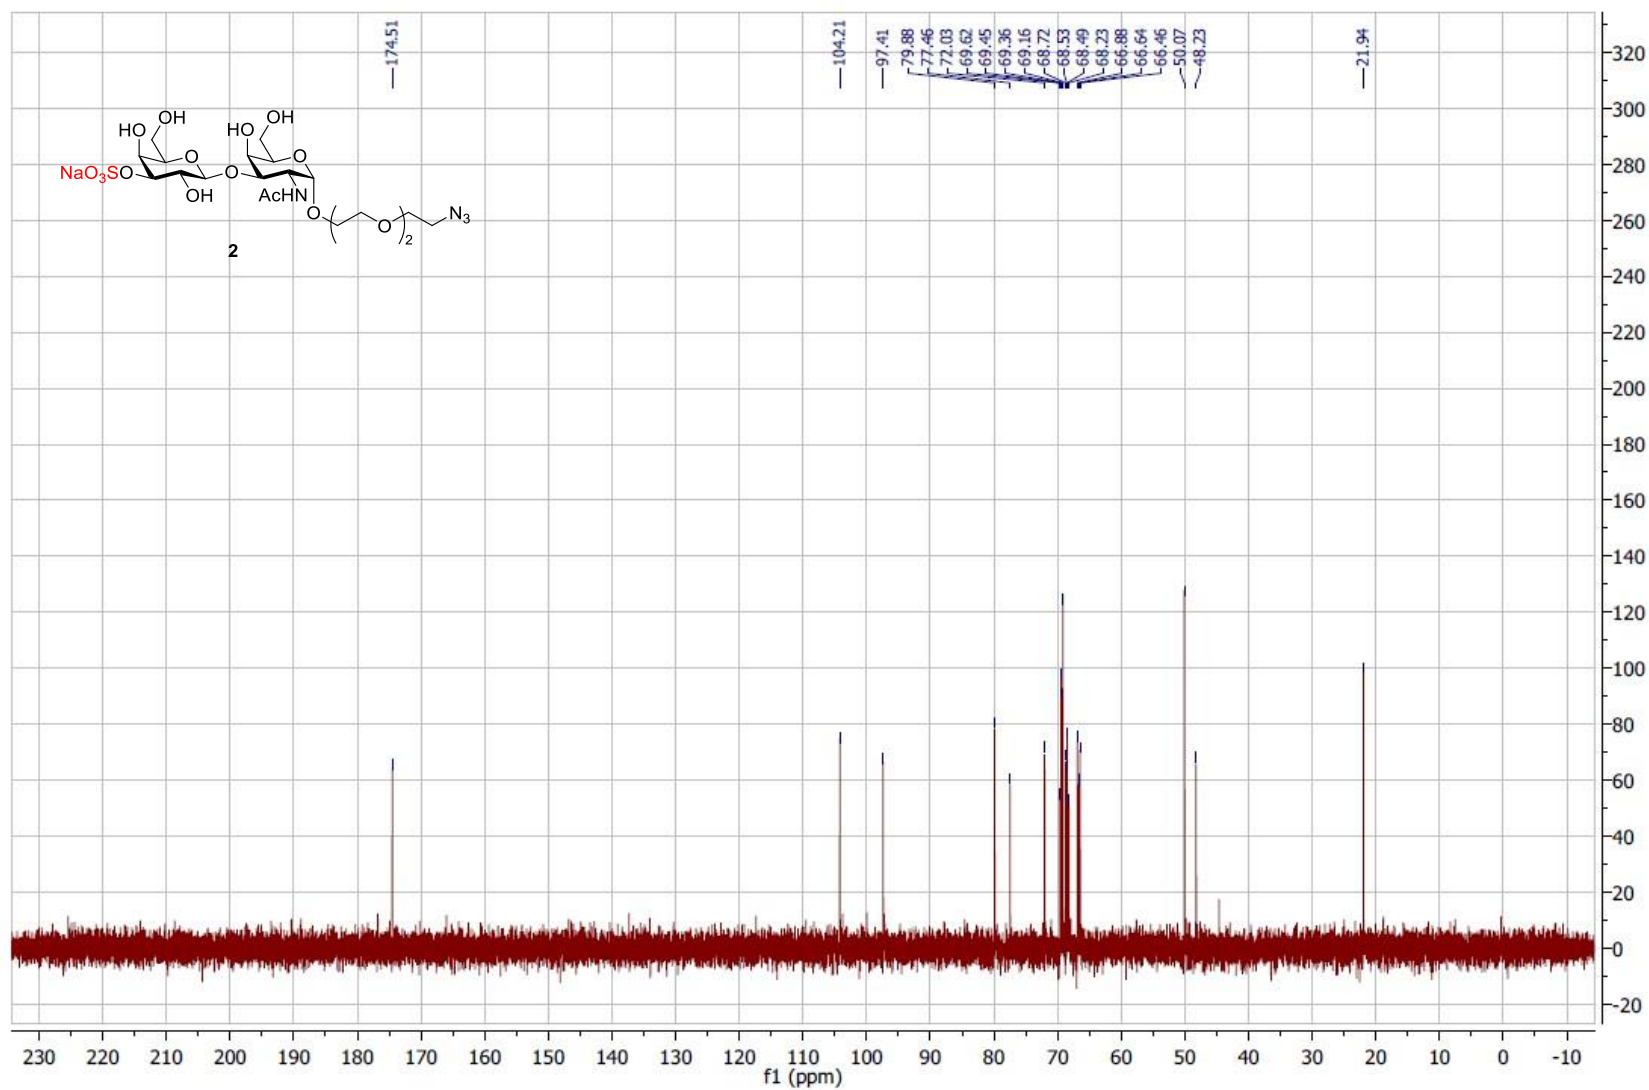

S14

**2-[2-(2-Azidoethoxy)ethoxy]ethyl 3-O-sulfo-β-D-galactopyranosyl-(1→3)-2-acetamido-2-deoxy-α-D-galactopyranoside sodium salt (2)**

HSQC, <sup>1</sup>H NMR, 400 MHz, <sup>13</sup>C NMR, 101 MHz

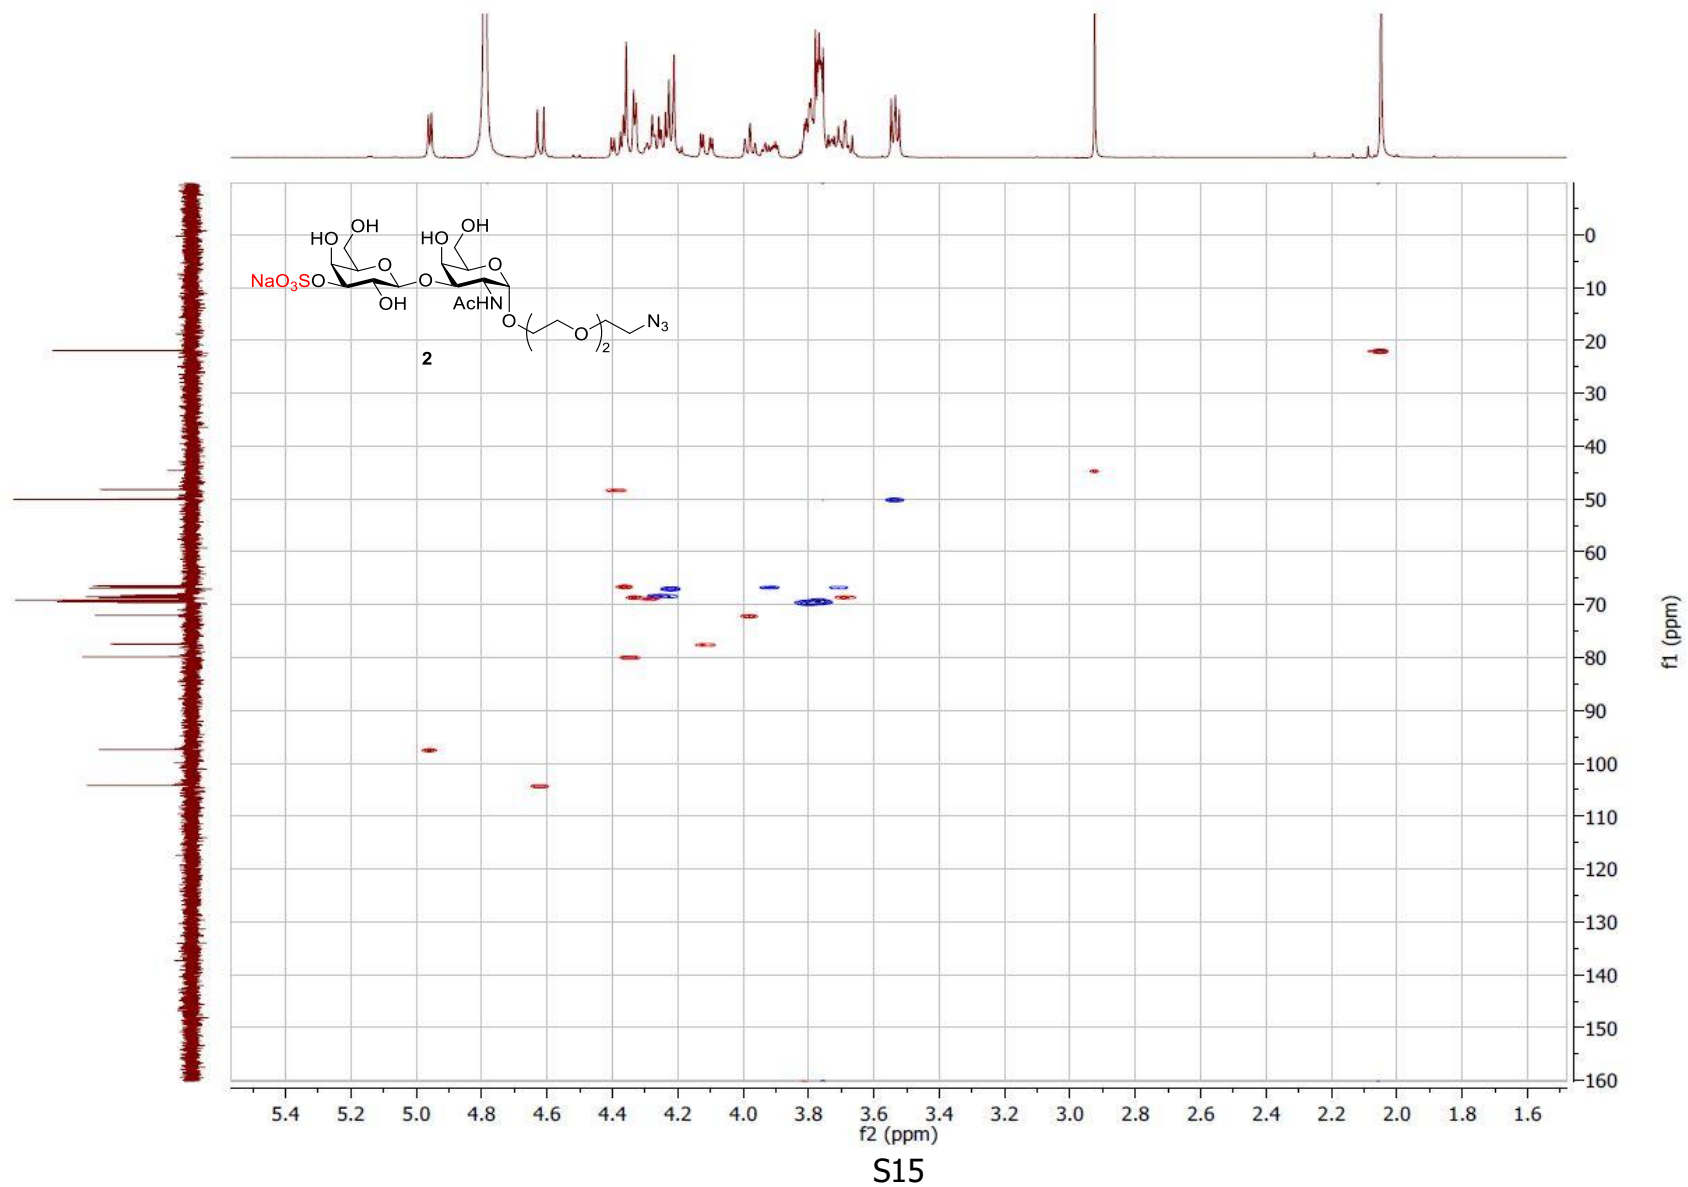

Supplement: Additional file 1 [file 1860-5397-20-17-S1.pdf]
